# Supplementary material
Source: Research Square preprint supplement (doi:10.21203/rs.3.rs-10099059/v1)
Supplement: Supplementary file 1 [file a4d1b63419bb55c1d490d0d3.docx]

# Supplementary Materials

Table S1 Physical and chemical properties of test site soil

| Soil layer (cm) | TN  (g kg−1) | TP  (g kg−1) | TK  (g kg−1) | pH | EC  (μs cm−1) | Organic matter  (g kg−1) | Alkali-N (mg kg−1) | Available P (mg kg−1) | Available K (mg kg−1) |
| --- | --- | --- | --- | --- | --- | --- | --- | --- | --- |
| 0–20 | 0.59 | 0.68 | 22.55 | 8.04 | 130.50 | 10.63 | 136.21 | 42.57 | 163.23 |
| 20–40 | 0.72 | 0.28 | 18.29 | 8.22 | 140.40 | 12.99 | 64.04 | 38.16 | 125.77 |

Note: Basic soil fertility of the experimental site.

Table S2 Water and fertilizer application in each experimental treatment

| Water | Fertilizer |
| --- | --- |
| W1: Feld water capacity 90% ± 5%  W2: Feld water capacity 80% ± 5%  W3: Feld water capacity 70% ± 5% | CK: Conventional fertilizer (600 kg ha−1)  F1: 85% CK + 15% N substitutes cattle manure  F2: 85% CK + 30,000 kg ha−1 cattle manure  F3: 85% CK + 60,000 kg ha−1 cattle manure  F4: 70% CK + 30% N substitutes cattle manure  F5: 70% CK + 30,000 kg ha−1 cattle manure  F6: 70% CK + 60,000 kg ha−1 cattle manure |

Note: The application rates of organic fertilizer used in this study were derived from: “Effects of the application of organic fertilizers on the yield, quality, and soil properties of open-field Chinese cabbage (*Brassica rapa* ssp. *pekinensis*) in China: A meta-analysis”[65].

Table S3 Basic nutrient content of soil under different treatments

| Treatment | Soil nutrients | | | | | | | | | | | |
| --- | --- | --- | --- | --- | --- | --- | --- | --- | --- | --- | --- | --- |
| pH | | EC (μs cm−1) | | Organic matter (g kg−1) | | TN (g kg−1) | | Available P (mg kg−1) | | Available K (mg kg−1) | |
| 2023 | 2024 | 2023 | 2024 | 2023 | 2024 | 2023 | 2024 | 2023 | 2024 | 2023 | 2024 |
| W1CK  W1F1  W1F2  W1F3  W1F4  W1F5  W1F6 | 8.33f | 7.58cd | 110.39gh | 123.23fg | 24.42cd | 18.27fg | 1.38f | 1.53ab | 18.40de | 18.40de | 181.91de | 182.61e |
| 8.08jk | 7.54de | 113.33gh | 118.10gh | 26.44bc | 18.38ef | 1.47de | 1.56ab | 19.17cd | 19.51cd | 176.42ef | 176.54ef |
| 8.18i | 7.58cd | 143.39d | 148.15cd | 31.32ab | 18.45ef | 1.74bc | 1.57ab | 9.54h | 9.52g | 164.29h | 165.14fg |
| 8.72b | 7.77ab | 199.29a | 195.28b | 36.00a | 18.77bc | 2.01a | 1.56ab | 17.52ef | 17.74ef | 175.12ef | 271.29b |
| 8.18i | 7.71ab | 103.39ij | 110.06ij | 27.70bc | 18.40ef | 1.56d | 1.52ab | 14.92fg | 14.81fg | 136.38ij | 137.94i |
| 8.23gh | 7.52ef | 132.39e | 134.19ef | 29.11bc | 18.44ef | 1.67c | 1.62a | 18.60de | 18.65de | 123.40k | 127.07i |
| 8.25gh | 7.69bc | 112.47gh | 116.99gh | 31.24ab | 18.45ef | 1.75bc | 1.63a | 10.64gh | 10.99g | 164.16h | 265.02b |
| W2CK  W2F1  W2F2  W2F3  W2F4  W2F5  W2F6 | 8.22gh | 7.48ef | 100.61j | 104.54ij | 21.62de | 18.34ef | 1.09j | 1.46bc | 23.26bc | 21.00bc | 179.81de | 178.48ef |
| 8.19hi | 7.58cd | 116.54fg | 120.61gh | 21.64de | 18.28fg | 1.13ij | 1.49ab | 25.32b | 23.28bc | 184.29cd | 94.93j |
| 8.37ef | 7.68bc | 162.39c | 166.23cd | 21.54de | 18.81bc | 1.19gh | 1.56ab | 26.55b | 26.09b | 189.26bc | 92.49jk |
| 8.40e | 7.84a | 163.25c | 166.63c | 25.73bc | 19.18a | 1.40ef | 1.62a | 24.18bc | 24.49bc | 199.46a | 287.74a |
| 8.42de | 7.34g | 121.39f | 101.64j | 20.68e | 18.55cd | 1.18gh | 1.41c | 24.32bc | 24.76bc | 133.35j | 132.31i |
| 8.48cd | 7.55de | 129.42e | 132.85ef | 20.07e | 18.52de | 1.18hi | 1.57ab | 24.30bc | 24.22bc | 161.08h | 161.45gh |
| 8.80a | 7.47ef | 143.50d | 147.16de | 21.38de | 18.75bc | 1.22gh | 1.62a | 25.42b | 23.43bc | 174.00fg | 78.44k |
| W3CK  W3F1  W3F2  W3F3  W3F4  W3F5  W3F6 | 8.26g | 7.36g | 145.19d | 151.93cd | 22.79cd | 17.66h | 1.27g | 1.60a | 25.16b | 24.75bc | 142.74i | 142.43i |
| 8.09j | 7.38fg | 142.43d | 142.41ef | 24.57cd | 17.65h | 0.74k | 1.52ab | 25.45b | 25.31b | 167.25gh | 160.01h |
| 7.84l | 7.54de | 184.44b | 187.48a | 26.58bc | 18.37ef | 1.41ef | 1.56ab | 21.50bc | 21.55bc | 193.86ab | 189.72e |
| 8.26g | 7.58cd | 130.54e | 133.59ef | 31.76ab | 18.83b | 1.78b | 1.56ab | 25.28b | 25.11b | 188.85bc | 276.02ab |
| 8.52c | 7.77ab | 107.56hi | 112.75ij | 24.61cd | 17.84h | 1.39ef | 1.53ab | 25.58b | 25.63b | 186.31cd | 174.96ef |
| 8.02k | 7.71ab | 160.37c | 162.67cd | 24.59cd | 18.25g | 1.39ef | 1.58ab | 35.01a | 34.99a | 115.91l | 216.27d |
| 8.20gh | 7.52ef | 110.36gh | 113.66hi | 25.51bc | 18.51de | 1.46ef | 1.57ab | 25.59b | 26.23b | 175.25ef | 238.61c |
| Y | 125.06*** | | 187.62*** | | 738.20*** | | 535.21*** | | 0.66ns | | 255.27*** | |
| W | 142.02*** | | 293.34*** | | 65.05*** | | 466.82*** | | 462.89*** | | 360.53*** | |
| F | 134.14*** | | 750.82*** | | 17.67*** | | 154.46*** | | 28.71*** | | 951.68*** | |
| Y × W | 128.03*** | | 117.90*** | | 71.95*** | | 347.51*** | | 1.05ns | | 774.85*** | |
| Y × F | 46.12*** | | 114.66*** | | 11.64*** | | 96.00*** | | 0.23ns | | 537.57*** | |
| W × F | 63.98*** | | 296.98*** | | 1.33ns | | 20.81*** | | 21.23*** | | 271.56*** | |
| Y × W × F | 70.65*** | | 107.41*** | | 1.63ns | | 23.83*** | | 0.29ns | | 185.27*** | |

Note: Effects of different treatments on soil nutrients in Chinese cabbage fields. Lowercase letters indicate significant differences among treatments. Y: Years, W: water, F: fertilizer. Y × W: Year–Water interaction, Y × F: Year–Fertilizer interaction, W × F: Water–fertilizer interaction, Y × W × F: Year–Water–Fertilizer interaction. Numbers denote: *F*-values, ns: *p* > 0.05, ***: *p* < 0.001.

Table S4 Effect of different water and fertilizer treatments on nutrient content and quality of Chinese cabbage

| Treatment | Nutrient content and quality | | | | | | | |
| --- | --- | --- | --- | --- | --- | --- | --- | --- |
| TN (g kg−1) | | TP (g kg−1) | | TK (g kg−1) | | Soluble sugar (%) | |
| 2023 | 2024 | 2023 | 2024 | 2023 | 2024 | 2023 | 2024 |
| W1CK  W1F1  W1F2  W1F3  W1F4  W1F5  W1F6 | 1.04 ± 0.02c | 1.05 ± 0.01b | 1.71 ± 0.02a | 1.72 ± 0.01a | 10.50 ± 0.02h | 10.55 ± 0.05g | 3.10 ± 0.02bc | 3.12 ± 0.02de |
| 0.40 ± 0.03i | 0.45 ± 0.05fg | 1.27 ± 0.03l | 1.29 ± 0.02l | 9.71 ± 0.05n | 9.75 ± 0.05mn | 3.29 ± 0.04a | 3.24 ± 0.02ab |
| 0.14 ± 0.02k | 0.15 ± 0.02i | 1.44 ± 0.03hi | 1.44 ± 0.02gh | 9.71 ± 0.03n | 9.71 ± 0.02n | 2.91 ± 0.06de | 2.95 ± 0.05h |
| 0.64 ± 0.02fg | 0.66 ± 0.02de | 1.54 ± 0.03ef | 1.55 ± 0.03de | 10.50 ± 0.03h | 10.52 ± 0.02gh | 3.00 ± 0.06cd | 3.02 ± 0.03gh |
| 0.64 ± 0.02fg | 0.68 ± 0.04d | 1.72 ± 0.03a | 1.74 ± 0.02a | 13.00 ± 0.02a | 13.02 ± 0.02a | 3.09 ± 0.03bc | 3.11 ± 0.02de |
| 0.83 ± 0.02a | 0.87 ± 0.03c | 1.46 ± 0.02gh | 1.48 ± 0.02fg | 10.70 ± 0.02g | 10.72 ± 0.02f | 3.10 ± 0.02bc | 3.12 ± 0.02cd |
| 1.43 ± 0.02a | 1.44 ± 0.01a | 1.30 ± 0.03kl | 1.33 ± 0.03kl | 10.30 ± 0.02j | 10.34 ± 0.04ij | 3.10 ± 0.04bc | 3.12 ± 0.02cd |
| W2CK  W2F1  W2F2  W2F3  W2F4  W2F5  W2F6 | 0.60 ± 0.03gh | 0.67 ± 0.06d | 1.73 ± 0.03a | 1.74 ± 0.01a | 10.10 ± 0.03l | 10.16 ± 0.06k | 3.00 ± 0.05cd | 3.02 ± 0.02gh |
| 0.39 ± 0.02i | 0.43 ± 0.04g | 1.36 ± 0.03jk | 1.36 ± 0.02jk | 9.80 ± 0.03n | 9.84 ± 0.04lm | 3.10 ± 0.02bc | 3.13 ± 0.03cd |
| 0.63 ± 0.02fg | 0.66 ± 0.03de | 1.59 ± 0.04de | 1.62 ± 0.02cd | 11.30 ± 0.03e | 11.32 ± 0.02d | 3.19 ± 0.03ab | 3.21 ± 0.01bc |
| 0.67 ± 0.02f | 0.69 ± 0.03d | 1.67 ± 0.02ab | 1.71 ± 0.03a | 10.20 ± 0.03k | 10.23 ± 0.04jk | 3.01 ± 0.05cd | 3.02 ± 0.03gh |
| 0.43 ± 0.02i | 0.45 ± 0.02fg | 1.60 ± 0.03cd | 1.63 ± 0.03bc | 10.40 ± 0.03i | 10.42 ± 0.02hi | 3.00 ± 0.04cd | 3.04 ± 0.03ef |
| 0.38 ± 0.02i | 0.44 ± 0.06g | 1.54 ± 0.03ef | 1.55 ± 0.02de | 8.81 ± 0.05p | 8.89 ± 0.09p | 3.19 ± 0.03ab | 3.23 ± 0.03ab |
| 0.90 ± 0.03d | 0.92 ± 0.02c | 1.36 ± 0.03jk | 1.38 ± 0.02ij | 9.40 ± 0.04o | 9.44 ± 0.04o | 3.20 ± 0.02ab | 3.23 ± 0.03ab |
| W3CK  W3F1  W3F2  W3F3  W3F4  W3F5  W3F6 | 1.14 ± 0.01b | 1.14 ± 0.02b | 1.48 ± 0.04gh | 1.50 ± 0.02ef | 10.30 ± 0.03j | 10.33 ± 0.03ij | 2.91 ± 0.03de | 2.95 ± 0.05gh |
| 0.41 ± 0.02i | 0.44 ± 0.03g | 1.39 ± 0.03ij | 1.41 ± 0.02hi | 11.90 ± 0.02b | 11.92 ± 0.02b | 3.20 ± 0.04ab | 3.21 ± 0.01bc |
| 0.23 ± 0.02j | 0.29 ± 0.06h | 1.70 ± 0.02ab | 1.69 ± 0.03ab | 11.50 ± 0.03d | 11.52 ± 0.02c | 2.91 ± 0.04de | 2.95 ± 0.05h |
| 0.58 ± 0.03gh | 0.61 ± 0.03de | 1.67 ± 0.02ab | 1.67 ± 0.01ab | 10.50 ± 0.03h | 10.55 ± 0.04g | 3.00 ± 0.04cd | 3.03 ± 0.03fg |
| 0.54 ± 0.02h | 0.60 ± 0.05de | 1.68 ± 0.02ab | 1.68 ± 0.01ab | 10.90 ± 0.03f | 10.92 ± 0.02e | 2.81 ± 0.06e | 2.86 ± 0.05i |
| 0.40 ± 0.04i | 0.44 ± 0.04g | 1.52 ± 0.02fg | 1.53 ± 0.02ef | 9.90 ± 0.03m | 9.94 ± 0.04l | 3.30 ± 0.03a | 3.31 ± 0.01a |
| 0.53 ± 0.03h | 0.56 ± 0.03ef | 1.62 ± 0.022ab | 1.62 ± 0.05bc | 11.60 ± 0.03c | 11.61 ± 0.01c | 3.30 ± 0.02a | 3.31 ± 0.02a |
| Y | 36.05*** | | 8.95** | | 25.45*** | | 13.61*** | |
| W | 436.16*** | | 127.60*** | | 78.58*** | | 12.28*** | |
| F | 112.39*** | | 423.76*** | | 36.87*** | | 175.41*** | |
| Y × W | 0.45ns | | 0.87ns | | 0.56ns | | 0.38ns | |
| Y × F | 0.41ns | | 0.14ns | | 0.49ns | | 0.59ns | |
| W × F | 386.30*** | | 101.37*** | | 40.14*** | | 65.43*** | |
| Y × W × F | 0.66ns | | 0.45ns | | 0.27ns | | 0.47ns | |

Note: Effects of different water and fertilizer treatments on nutrient uptake and quality of Chinese cabbage. Lowercase letters indicate significant differences among treatments. Y: Years, W: water, F: fertilizer. Y × W: Year–Water interaction, Y × F: Year–Fertilizer interaction, W × F: Water–fertilizer interaction, Y × W × F: Year–Water–Fertilizer interaction. Numbers denote: *F*-values, ns: *p* > 0.05, **: *p* < 0.01, ***: *p* < 0.001.

Table S5 Effect of different water and fertilizer treatments on the growth of Chinese cabbage

| Treatment | Growth of Chinese cabbage | | | | | | | |
| --- | --- | --- | --- | --- | --- | --- | --- | --- |
| Plant height (cm) | | Perimeter (cm) | | Fresh weight (kg plant−1) | | SPAD | |
| 2023 | 2024 | 2023 | 2024 | 2023 | 2024 | 2023 | 2024 |
| W1CK  W1F1  W1F2  W1F3  W1F4  W1F5  W1F6 | 34.33 ± 2.52ab | 37.67 ± 2.31a | 56.67 ± 1.53ab | 56.17 ± 1.89a | 1.99 ± 0.18a | 2.18 ± 0.40a | 38.57 ± 0.81a | 55.47 ± 0.97ab |
| 34.67 ± 0.58ab | 35.37 ± 2.81a | 55.67 ± 1.53ab | 55.00 ± 2.65a | 2.04 ± 0.30a | 2.18 ± 0.19a | 38.67 ± 2.22a | 50.30 ± 3.30ab |
| 33.33 ± 1.53ab | 37.67 ± 0.29a | 53.33 ± 3.21ab | 57.67 ± 4.16a | 2.45 ± 0.38a | 2.84 ± 0.74a | 36.80 ± 3.86a | 53.47 ± 5.08ab |
| 32.33 ± 2.52bc | 36.83 ± 2.36a | 61.00 ± 2.65a | 53.67 ± 5.51a | 2.33 ± 0.51a | 2.47 ± 0.41a | 36.77 ± 2.83a | 55.90 ± 2.90ab |
| 37.67 ± 2.52ab | 36.83 ± 0.29a | 57.67 ± 4.72ab | 58.83 ± 4.72a | 2.13 ± 0.24a | 2.29 ± 0.63a | 39.03 ± 5.04a | 50.17 ± 2.99ab |
| 37.00 ± 4.58ab | 36.83 ± 2.47a | 58.33 ± 2.31ab | 62.00 ± 6.25a | 2.23 ± 0.20a | 2.75 ± 0.51a | 37.97 ± 5.90a | 55.33 ± 2.26ab |
| 39.67 ± 1.15a | 37.00 ± 2.65a | 60.67 ± 4.73ab | 52.50 ± 3.50a | 2.25 ± 0.18a | 2.61 ± 0.56a | 38.40 ± 6.99a | 51.53 ± 4.83ab |
| W2CK  W2F1  W2F2  W2F3  W2F4  W2F5  W2F6 | 31.00 ± 1.00bc | 34.67 ± 1.15a | 54.00 ± 1.00ab | 58.00 ± 3.50a | 2.11 ± 0.08a | 2.03 ± 0.08a | 36.93 ± 5.15a | 52.57 ± 5.56ab |
| 30.67 ± 1.53cd | 36.33 ± 0.58a | 59.67 ± 0.58ab | 55.33 ± 4.19a | 2.25 ± 0.31a | 2.37 ± 0.47a | 41.03 ± 5.94a | 46.67 ± 2.06b |
| 31.67 ± 3.06bc | 35.67 ± 0.28a | 55.33 ± 1.53ab | 50.17 ± 2.02a | 2.60 ± 0.38a | 2.94 ± 0.36a | 45.10 ± 3.97a | 49.73 ± 1.95ab |
| 33.33 ± 2.52ab | 34.33 ± 4.19a | 60.00 ± 2.00ab | 55.00 ± 2.65a | 2.50 ± 0.34a | 2.94 ± 0.37a | 38.00 ± 2.59a | 51.10 ± 5.05ab |
| 31.33 ± 1.53bc | 36.00 ± 0.50a | 57.67 ± 2.52ab | 55.33 ± 1.89a | 2.30 ± 0.27a | 2.37 ± 0.32a | 43.37 ± 0.75a | 50.00 ± 1.99ab |
| 30.00 ± 1.73d | 34.50 ± 0.50a | 57.33 ± 2.31ab | 50.50 ± 1.82a | 2.38 ± 0.78a | 2.65 ± 0.40a | 42.63 ± 1.46a | 47.43 ± 3.23ab |
| 31.67 ± 1.54bc | 33.50 ± 1.80a | 58.00 ± 5.29ab | 52.67 ± 4.48a | 2.47 ± 0.17a | 2.56 ± 0.41a | 43.10 ± 1.15a | 46.83 ± 2.70ab |
| W3CK  W3F1  W3F2  W3F3  W3F4  W3F5  W3F6 | 30.67 ± 4.62cd | 32.83 ± 3.05a | 53.33 ± 7.57ab | 54.33 ± 4.31a | 1.84 ± 0.08a | 2.19 ± 0.42a | 42.30 ± 3.20a | 47.87 ± 3.49ab |
| 29.00 ± 1.00d | 33.50 ± 2.29a | 51.00 ± 3.46ab | 50.33 ± 4.48a | 1.86 ± 0.41a | 1.89 ± 0.34a | 42.60 ± 5.45a | 55.30 ± 8.15ab |
| 29.00 ± 2.00d | 34.67 ± 1.60a | 50.00 ± 4.58b | 53.00 ± 3.61a | 2.36 ± 0.26a | 2.05 ± 0.34a | 42.00 ± 3.16a | 45.37 ± 2.95b |
| 30.00 ± 1.00d | 34.50 ± 1.73a | 53.33 ± 2.31ab | 53.83 ± 4.65a | 2.09 ± 0.45a | 2.23 ± 0.35a | 39.03 ± 6.79a | 56.50 ± 4.26ab |
| 30.00 ± 1.73d | 35.50 ± 1.00a | 53.67 ± 4.51ab | 54.00 ± 3.50a | 1.90 ± 0.12a | 2.21 ± 0.33a | 42.60 ± 2.95a | 51.00 ± 0.75ab |
| 30.00 ± 1.00d | 34.83 ± 1.89a | 51.67 ± 2.89ab | 55.83 ± 2.56a | 1.97 ± 0.65a | 2.35 ± 0.25a | 41.87 ± 1.31a | 58.20 ± 2.60a |
| 30.00 ± 1.00d | 37.33 ± 1.15a | 55.33 ± 3.52ab | 60.83 ± 6.78a | 1.99 ± 0.20a | 2.96 ± 0.72a | 42.07 ± 4.35a | 55.77 ± 2.13ab |
| Y | 78.02*** | | 1.76ns | | 12.36*** | | 265.43*** | |
| W | 41.25*** | | 9.06*** | | 7.91** | | 3.24* | |
| F | 1.43ns | | 1.80ns | | 4.59*** | | 0.43ns | |
| Y × W | 8.06** | | 5.73** | | 0.21ns | | 9.49*** | |
| Y × F | 0.59ns | | 1.26ns | | 0.60ns | | 2.52* | |
| W × F | 1.20ns | | 1.56ns | | 0.59ns | | 1.34ns | |
| Y × W × F | 1.92* | | 1.63ns | | 0.78ns | | 1.74ns | |

Note: Responses of Chinese cabbage agronomic traits to different water and fertilizer treatments. Lowercase letters indicate significant differences among treatments. Y: Years, W: water, F: fertilizer. Y × W: Year–Water interaction, Y × F: Year–Fertilizer interaction, W × F: Water–fertilizer interaction, Y × W × F: Year–Water–Fertilizer interaction. Numbers denote: *F*-values, ns: *p* > 0.05, *: *p* < 0.05, **: *p* < 0.01, ***: *p* < 0.001.
